# Supplementary material for: Antibacterial and Antibiotic-Modifying Activity of Methanol Extracts from Six Cameroonian Food Plants against Multidrug-Resistant Enteric Bacteria
Source: Hindawi journal article supplement (doi:10.1155/2017/1583510), 2017-01-01
Supplement: f1 [file 1583510.f1.pdf]

**Table S 1. Preliminary test of MIC of different antibiotics after the association of the extracts at MIC/2, MIC/4, MIC/8 and MIC/16 against *P. aeruginosa* PA124 strain.**

| ATB | CON  | <i>Citrus sinensis</i>       |                             |                             |                             | <i>Psidium guajava (leaves)</i>    |                                    |                                    |                                    | <i>Persea Americana (bark)</i>     |                                    |                                    |                                    | <i>Persea americana (leaves)</i>   |                                    |                                    |                                    |
|-----|------|------------------------------|-----------------------------|-----------------------------|-----------------------------|------------------------------------|------------------------------------|------------------------------------|------------------------------------|------------------------------------|------------------------------------|------------------------------------|------------------------------------|------------------------------------|------------------------------------|------------------------------------|------------------------------------|
|     |      | MIC/2                        | MIC/4                       | MIC/8                       | MIC/16                      | MIC/2                              | MIC/4                              | MIC/8                              | MIC/16                             | MIC/2                              | MIC/4                              | MIC/8                              | MIC/16                             | MIC/2                              | MIC/4                              | MIC/8                              | MIC/16                             |
| CHL | 128  | <b>32(0,25)<sup>S</sup></b>  | 128(1) <sup>I</sup>         | 128(1) <sup>I</sup>         | 128(1) <sup>I</sup>         | 128(1) <sup>I</sup>                | 128(1) <sup>I</sup>                | 128(1) <sup>I</sup>                | 128(1) <sup>I</sup>                | <b>64(0,5)<sup>S</sup></b>         | <b>64(0,5)<sup>S</sup></b>         | <b>64(0,5)<sup>S</sup></b>         | <b>64(0,5)<sup>S</sup></b>         | <b>64(0,5)<sup>S</sup></b>         | <b>64(0,5)<sup>S</sup></b>         | <b>64(0,5)<sup>S</sup></b>         | 128(1) <sup>I</sup>                |
| CIP | 64   | <b>16(0,25)<sup>S</sup></b>  | <b>32(0,5)<sup>S</sup></b>  | <b>32(0,5)<sup>S</sup></b>  | <b>32(0,5)<sup>S</sup></b>  | <b>32(0,5)<sup>S</sup></b>         | <b>32(0,5)<sup>S</sup></b>         | <b>32(0,5)<sup>S</sup></b>         | <b>32(0,5)<sup>S</sup></b>         | <b>32(0,5)<sup>S</sup></b>         | <b>32(0,5)<sup>S</sup></b>         | <b>32(0,5)<sup>S</sup></b>         | <b>32(0,5)<sup>S</sup></b>         | 64(1) <sup>I</sup>                 | 64(1) <sup>I</sup>                 | 64(1) <sup>I</sup>                 | 64(1) <sup>I</sup>                 |
| TET | 16   | <b>4(0,25)<sup>S</sup></b>   | <b>8(0,5)<sup>S</sup></b>   | <b>64(4)<sup>A</sup></b>    | <b>64(4)<sup>A</sup></b>    | <b>8(0,5)<sup>S</sup></b>          | <b>8(0,5)<sup>S</sup></b>          | <b>8(0,5)<sup>S</sup></b>          | <b>8(0,5)<sup>S</sup></b>          | <b>8(0,5)<sup>S</sup></b>          | <b>8(0,5)<sup>S</sup></b>          | <b>8(0,5)<sup>S</sup></b>          | <b>8(0,5)<sup>S</sup></b>          | 16(1) <sup>I</sup>                 | 16(1) <sup>I</sup>                 | 16(1) <sup>I</sup>                 | <b>32(2)<sup>A</sup></b>           |
| ERY | 128  | 128(1) <sup>I</sup>          | 128(1) <sup>I</sup>         | 128(1) <sup>I</sup>         | 128(1) <sup>I</sup>         | 128(1) <sup>I</sup>                | 128(1) <sup>I</sup>                | 128(1) <sup>I</sup>                | 128(1) <sup>I</sup>                | 128(1) <sup>I</sup>                | 128(1) <sup>I</sup>                | 128(1) <sup>I</sup>                | 128(1) <sup>I</sup>                | 128(1) <sup>I</sup>                | 128(1) <sup>I</sup>                | 128(1) <sup>I</sup>                | 128(1) <sup>I</sup>                |
| KAN | 128  | 128(1) <sup>I</sup>          | 128(1) <sup>I</sup>         | 128(1) <sup>I</sup>         | 128(1) <sup>I</sup>         | 128(1) <sup>I</sup>                | 128(1) <sup>I</sup>                | 128(1) <sup>I</sup>                | 128(1) <sup>I</sup>                | 128(1) <sup>I</sup>                | 128(1) <sup>I</sup>                | 128(1) <sup>I</sup>                | 128(1) <sup>I</sup>                | <b>64(0,5)<sup>S</sup></b>         | <b>64(0,5)<sup>S</sup></b>         | <b>64(0,5)<sup>S</sup></b>         | 128(1) <sup>I</sup>                |
| STR | 256  | <b>32(0,125)<sup>S</sup></b> | <b>128(0,5)<sup>S</sup></b> | <b>128(0,5)<sup>S</sup></b> | <b>128(0,5)<sup>S</sup></b> | <b>128(0,5)<sup>S</sup></b>        | <b>128(0,5)<sup>S</sup></b>        | <b>128(0,5)<sup>S</sup></b>        | <b>128(0,5)<sup>S</sup></b>        | <b>64(0,25)<sup>S</sup></b>        | <b>64(0,25)<sup>S</sup></b>        | <b>64(0,25)<sup>S</sup></b>        | <b>64(0,25)<sup>S</sup></b>        | <b>64(0,25)<sup>S</sup></b>        | <b>64(0,25)<sup>S</sup></b>        | <b>64(0,25)<sup>S</sup></b>        | <b>64(0,25)<sup>S</sup></b>        |
| AMP | >256 | >256(≥1) <sup>I</sup>        | >256(≥1) <sup>I</sup>       | >256(≥1) <sup>I</sup>       | >256(≥1) <sup>I</sup>       | >256(≥1) <sub>I</sub> <sup>I</sup> | >256(≥1) <sub>I</sub> <sup>I</sup> | >256(≥1) <sub>I</sub> <sup>I</sup> | >256(≥1) <sub>I</sub> <sup>I</sup> | >256(≥1) <sub>I</sub> <sup>I</sup> | >256(≥1) <sub>I</sub> <sup>I</sup> | >256(≥1) <sub>I</sub> <sup>I</sup> | >256(≥1) <sub>I</sub> <sup>I</sup> | >256(≥1) <sub>I</sub> <sup>I</sup> | >256(≥1) <sub>I</sub> <sup>I</sup> | >256(≥1) <sub>I</sub> <sup>I</sup> | >256(≥1) <sub>I</sub> <sup>I</sup> |
| CEF | >256 | >256(≥1) <sup>I</sup>        | >256(≥1) <sup>I</sup>       | >256(≥1) <sup>I</sup>       | >256(≥1) <sup>I</sup>       | >256(≥1) <sub>I</sub> <sup>I</sup> | >256(≥1) <sub>I</sub> <sup>I</sup> | >256(≥1) <sub>I</sub> <sup>I</sup> | >256(≥1) <sub>I</sub> <sup>I</sup> | >256(≥1) <sub>I</sub> <sup>I</sup> | >256(≥1) <sub>I</sub> <sup>I</sup> | >256(≥1) <sub>I</sub> <sup>I</sup> | >256(≥1) <sub>I</sub> <sup>I</sup> | >256(≥1) <sub>I</sub> <sup>I</sup> | >256(≥1) <sub>I</sub> <sup>I</sup> | >256(≥1) <sub>I</sub> <sup>I</sup> | >256(≥1) <sub>I</sub> <sup>I</sup> |

| ATB | CON  | <i>Coula edulis</i>         |                             |                             |                             | <i>Mangifera indica (Leaves)</i> |                             |                              |                             | <i>Camellia sinensis</i>     |                              |                              |                              |
|-----|------|-----------------------------|-----------------------------|-----------------------------|-----------------------------|----------------------------------|-----------------------------|------------------------------|-----------------------------|------------------------------|------------------------------|------------------------------|------------------------------|
|     |      | MIC/2                       | MIC/4                       | MIC/8                       | MIC/16                      | MIC/2                            | MIC/4                       | MIC/8                        | MIC/16                      | MIC/2                        | MIC/4                        | MIC/8                        | MIC/16                       |
| CHL | 128  | <b>64(0,5)<sup>S</sup></b>  | <b>64(0,5)<sup>S</sup></b>  | <b>64(0,5)<sup>S</sup></b>  | <b>64(0,5)<sup>S</sup></b>  | <b>4(0,0312)<sup>S</sup></b>     | <b>8(0,062)<sup>S</sup></b> | <b>16(0,125)<sup>S</sup></b> | <b>32(0,25)<sup>S</sup></b> | <b>8(0,0625)<sup>S</sup></b> | <b>8(0,0625)<sup>S</sup></b> | <b>8(0,0625)<sup>S</sup></b> | <b>8(0,0625)<sup>S</sup></b> |
| CIP | 64   | <b>16(0,25)<sup>S</sup></b> | <b>16(0,25)<sup>S</sup></b> | <b>32(0,5)<sup>S</sup></b>  | <b>32(0,5)<sup>S</sup></b>  | <b>4(0,0625)<sup>S</sup></b>     | <b>32(0,5)<sup>S</sup></b>  | <b>32(0,5)<sup>S</sup></b>   | <b>32(0,5)<sup>S</sup></b>  | <b>32(0,5)<sup>S</sup></b>   | <b>32(0,5)<sup>S</sup></b>   | <b>32(0,5)<sup>S</sup></b>   | 64(1) <sup>I</sup>           |
| TET | 16   | 16(1) <sup>I</sup>          | 16(1) <sup>I</sup>          | 16(1) <sup>I</sup>          | <b>32(2)<sup>A</sup></b>    | <b>8(0,5)<sup>S</sup></b>        | <b>8(0,5)<sup>S</sup></b>   | <b>8(0,5)<sup>S</sup></b>    | <b>8(0,5)<sup>S</sup></b>   | <b>8(0,5)<sup>S</sup></b>    | 16(1) <sup>I</sup>           | 16(1) <sup>I</sup>           | 16(1) <sup>I</sup>           |
| ERY | 128  | 128(1) <sup>I</sup>         | 128(1) <sup>I</sup>         | 128(1) <sup>I</sup>         | 128(1) <sup>I</sup>         | <b>8(0,5)<sup>S</sup></b>        | <b>64(0,5)<sup>S</sup></b>  | <b>64(0,5)<sup>S</sup></b>   | 128(1) <sup>I</sup>         | 128(1) <sup>I</sup>          | 128(1) <sup>I</sup>          | 128(1) <sup>I</sup>          | 128(1) <sup>I</sup>          |
| KAN | 128  | 128(1) <sup>I</sup>         | 128(1) <sup>I</sup>         | 128(1) <sup>I</sup>         | 128(1) <sup>I</sup>         | <b>16(0,125)<sup>S</sup></b>     | <b>32(0,25)<sup>S</sup></b> | <b>64(0,5)<sup>S</sup></b>   | <b>64(0,5)<sup>S</sup></b>  | <b>64(0,5)<sup>S</sup></b>   | <b>64(0,5)<sup>S</sup></b>   | <b>64(0,5)<sup>S</sup></b>   | <b>64(0,5)<sup>S</sup></b>   |
| STR | 256  | <b>64(0,25)<sup>S</sup></b> | <b>64(0,25)<sup>S</sup></b> | <b>64(0,25)<sup>S</sup></b> | <b>64(0,25)<sup>S</sup></b> | <b>128(0,5)<sup>S</sup></b>      | <b>128(0,5)<sup>S</sup></b> | <b>128(0,5)<sup>S</sup></b>  | <b>128(0,5)<sup>S</sup></b> | <b>64(0,25)<sup>S</sup></b>  | <b>64(0,25)<sup>S</sup></b>  | <b>64(0,25)<sup>S</sup></b>  | <b>64(0,25)<sup>S</sup></b>  |
| AMP | >256 | >256(≥1) <sup>I</sup>       | >256(≥1) <sup>I</sup>       | >256(≥1) <sup>I</sup>       | >256(≥1) <sup>I</sup>       | <b>4(na)<sup>S</sup></b>         | <b>256(na)<sup>S</sup></b>  | >256(≥1) <sup>I</sup>        | >256(≥1) <sup>I</sup>       | >256(≥1) <sup>I</sup>        | >256(≥1) <sup>I</sup>        | >256(≥1) <sup>I</sup>        | >256(≥1) <sup>I</sup>        |
| CEF | >256 | >256(≥1) <sup>I</sup>       | >256(≥1) <sup>I</sup>       | >256(≥1) <sup>I</sup>       | >256(≥1) <sup>I</sup>       | <b>4(na)<sup>S</sup></b>         | <b>64(na)<sup>S</sup></b>   | >256(≥1) <sup>I</sup>        | >256(≥1) <sup>I</sup>       | >256(≥1) <sup>I</sup>        | >256(≥1) <sup>I</sup>        | >256(≥1) <sup>I</sup>        | >256(≥1) <sup>I</sup>        |

<sup>a</sup>Antibiotics [TET: tetracycline, CIP: ciprofloxacin, STP: streptomycin, KAN: kanamycin, CHL: chloramphenicol, ERY: erythromycin, AMP: ampicillin, CEF: cefepime].

<sup>b</sup>(<sub>I</sub>): FIC (Fractional Inhibitory Concentration) of the antibiotics after association with plants extract; S: Synergy, I: Indifference; The values in bold represent the cases of synergy between extract and antibiotics
